# Supplementary material for: Exploring the crystallisation of aspirin in a confined porous material using solid-state nuclear magnetic resonance
Source: Royal Society of Chemistry journal article supplement (doi:10.1039/d4fd00123k), 2024-07-16
Supplement: d4fd00123k1.pdf [file d4fd00123k1.pdf]

## Supplementary Information

### Exploring the crystallisation of aspirin in a confined porous material using solid-state nuclear magnetic resonance

Marie Juramy,<sup>a†</sup> Eric Besson,<sup>a</sup> Stéphane Gastaldi,<sup>a</sup> Fabio Ziarelli,<sup>b</sup> Stéphane Viel,<sup>ac</sup> Giulia Mollica<sup>a</sup> and Pierre Thureau<sup>\*a</sup>

<sup>a</sup> Aix-Marseille Univ, CNRS, ICR UMR 7273, 13397 Marseille, France.

<sup>b</sup> Aix-Marseille Univ, Centrale Méditerranée, CNRS, Fédération des Sciences Chimiques FR 1739, 13397 Marseille, France.

<sup>c</sup> Institut Universitaire de France, 75005 Paris, France.

<sup>†</sup>Present address: Yusuf Hamied Department of Chemistry, University of Cambridge, Cambridge CB2 1EW, U.K.

#### 1. Signal Deconvolution using 2 Gaussian Peaks

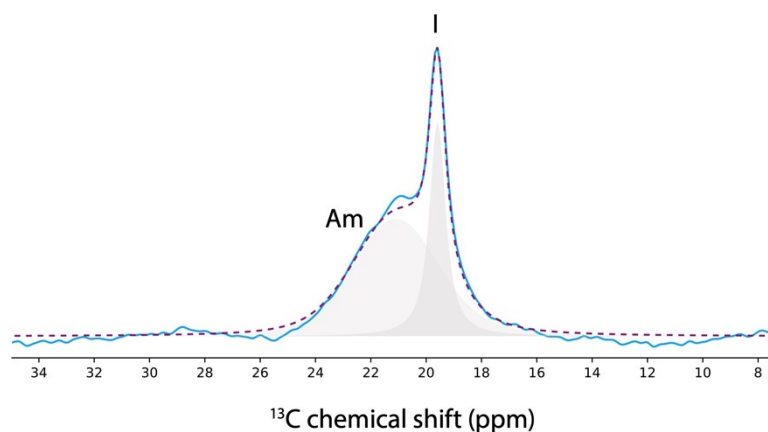

**Fig S1:** <sup>13</sup>C NMR resonances corresponding to the methyl group of aspirin spectrum (blue curve) recorded at 98K on a mesoporous silica 2 days after impregnation with a solution of aspirin in ethanol (0.8 M). The 2 Gaussian peaks used for the deconvolution are shown as filled grey shapes and their sum is shown as a dotted purple line. The 2 Gaussian peaks correspond to the individual <sup>13</sup>C NMR resonances of the amorphous phase (Am) and the crystalline phase of form I of aspirin.
